# Supplementary material for: Mycotoxin ochratoxin A disrupts renal development via a miR-731/prolactin receptor axis in zebrafish
Source: Royal Society of Chemistry journal article supplement (doi:10.1039/c5tx00360a), 2016-01-01

## Supplementary information

Table S1

| Primers Used for the PCR Analysis |                                                                                                       |                    |
|-----------------------------------|-------------------------------------------------------------------------------------------------------|--------------------|
| Gene                              | Sequences                                                                                             | Annealing Temp(°C) |
| <b>mRNA primers</b>               |                                                                                                       |                    |
| PRLRa                             | F: 5'- GTGGTTTTTCTCTCATCTCTGACA -3'<br>R: 5'- ACACTCTTTGACCGTCTCGG -3'                                | 54.3               |
| serpina1                          | F: 5'- TTGGGTCACAGTCAGGATGC -3'<br>R: 5'- CTGCTTCTGTGCCCTTCTCA -3'                                    | 55                 |
| myc                               | F: 5'- CGACTACGACTCCATCCAGC-3'<br>R: 5'- GAGTAGTCCGCATCATCGCA-3'                                      | 54.3               |
| PRLRb                             | F: 5'-CTATG TGGTA GACGT GCGCT-3'<br>R: 5'-CACTT GATGG TCCGT GCTCT-3'                                  | 55                 |
| EF                                | F: 5'- GCTCAAGGAGAAGATCG -3'<br>R: 5'- TCAAGCATTATCCAGTCC -3'                                         | 55                 |
| <b>miRNA primers</b>              |                                                                                                       |                    |
| miR-731                           | RT : 5'- GTTGGCTCTGGTGCAGGGTCCGAGGTATTCGCA<br>CCAGAGCCAACCGATCC -3'                                   |                    |
| miR-26a                           | F: 5'- ATACTTAATGACACGTTTTCTCCC<br>RT: 5'-GTTGGCTCTGGTGCAGGGTCCGAGGTATTCGCA<br>CCAGAGCCAACAGCCTTA-3'  |                    |
| U6                                | F: 5'-ATCTGGTTCAAGTAATCCAGGA-3'<br>RT : 5'-GTTGGCTCTGGTGCAGGGTCCGAGGTATTCGCA<br>CCAGAGCCAACAAAATAT-3' |                    |
| Universal-R                       | F: 5'- TTCCTCCGCAAGGATGACACGC-3'<br>R: 5'-GTGCAGGGTCCGAGGT-3'                                         |                    |

*Note.* F: forward; R: reverse;  
 RT: Stem-loop reverse transcription primer; Universal-R is for all miRNAs

**Figure S1. Chemical structure of ochratoxin A**

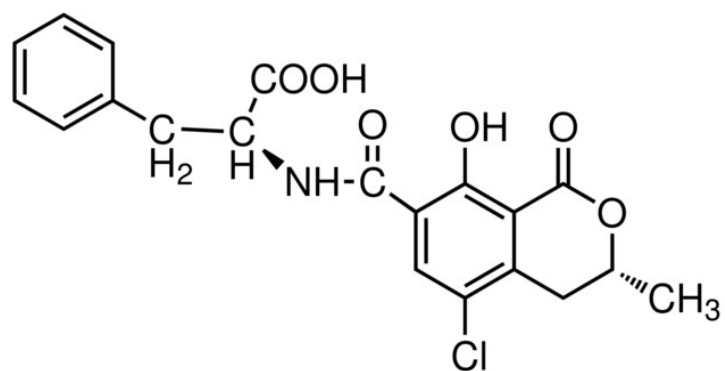

**Figure S2.** OTA did not modulate the c-myc protein signal in zebrafish embryos. WT embryos were treated with vehicle or OTA from 6 to 72 hpf. Total protein extracts of 72 hpf embryos were subjected to Western blotting using antibodies specific to c-myc and actin (internal control).

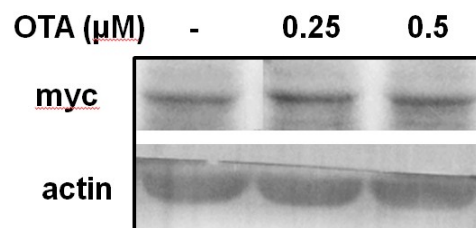

**Figure S3.** OTA induced PRLRb mRNA expression in zebrafish embryos. The 6 hpf WT embryos were exposed to PBS or OTA, and then the PRLRb mRNA of 48 hpf embryos was detected by RT-PCR. The relative PRLRb levels are shown in the below panel and given as the mean  $\pm$  SEM (n = 3). EF was used as an internal control.

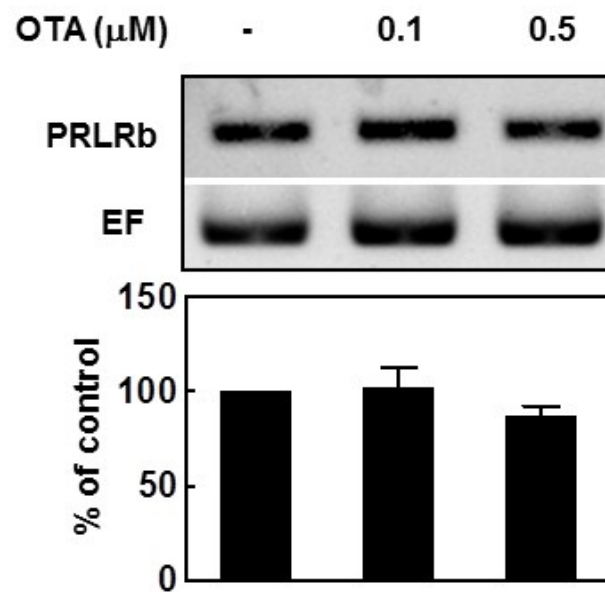

Supplement: c5tx00360a1.pdf [file c5tx00360a1.pdf]
